# Supplementary material for: Pleomorphic effects of three small-molecule inhibitors on transcription elongation by Mycobacterium tuberculosis RNA polymerase
Source: eLife journal article supplement (doi:10.7554/elife.105545), 2025-10-03
Supplement: supp [file elife_poa_e105545_Supplementary_File_2.xlsx]

## Sheet: Sheet1
Supplementary File 2: Summary of Traces
RNAP	Template	Experimental Mode	Applied Force (pN, + is assisting, - is opposing)	rNTP Condition	Inhibitor/ Factor?	Used in Figure?	N Traces	Dryad Folder Name
Eco	Eco Ruler	Assisting Constant Force	15	Cocktail (1mM rUTP, 1mM rGTP, 0.5mM rATP, 0.25mM rCTP)	No	1d-e, 2a, 3b-c	5	'aa EE Cocktail 15pN'
Eco	Eco Ruler	Assisting Constant Force	20	Cocktail (1mM rUTP, 1mM rGTP, 0.5mM rATP, 0.25mM rCTP)	No	1d-e, 2a, 3b-c	11	'ab EE Cocktail 20pN'
Eco	Eco Ruler	Assisting Constant Force	25	Cocktail (1mM rUTP, 1mM rGTP, 0.5mM rATP, 0.25mM rCTP)	No	1d-e, 2a, 3b-c	7	'ac EE Cocktail 25pN'
Mtb	Eco Ruler	Assisting Constant Force	18	1mM	No	3b-c	12	'b ME'
Mtb	Eco Ruler	Assisting Constant Force	18	Cocktail (1mM rUTP, 1mM rGTP, 0.5mM rATP, 0.25mM rCTP)	No	3b-c	12	'bb ME Cocktail'
Eco	Eco Ruler	Assisting Constant Force	10	1mM	5uM PUM	6a-d	22	'ca EE PUM 5uM'
Eco	Eco Ruler	Assisting Constant Force	10	1mM	50nM PUM	6a-d	12	'cb EE PUM 50nM'
Eco	Eco Ruler	Assisting Constant Force	10	1mM	100nM PUM	6a-d	13	'cc EE PUM 100nM'
Eco	Eco Ruler	Assisting Constant Force	10	1mM	200nM PUM	6a-d	9	'cd EE PUM 200nM'
Eco	Eco Ruler	Assisting Constant Force	10	1mM	1000nM PUM	6a-d	27	'ce EE PUM 1000nM'
Mtb	Mtb Genomic Template	Assisting Constant Force	18	1mM	No	S3, S4, S5	9	'AF AAP concentration'\'210nM AAP AF'
Mtb	Mtb Genomic Template	Assisting Constant Force	18	1mM	No	S3, S4, S6	10	'AF AAP concentration'\'280nM AAP AF'
Mtb	Mtb Genomic Template	Assisting Constant Force	18	1mM	No	S3, S4, S7	11	'AF AAP concentration'\'35nM AAP AF'
Mtb	Mtb Genomic Template	Assisting Constant Force	18	1mM	No	S3, S4, S8	1	'AF AAP concentration'\'70nM AAP AF'
Mtb	Mtb Genomic Template	Assisting Constant Force	18	1mM	No	S3, S4, S9	5	'AF AAP concentration'\'AFs MtbRNAP'
Mtb	Mtb Genomic Template	Assisting Constant Force	10	1mM	No	1d-e, 2a	7	'AFs MtbRNAP'\'~10pN'
Mtb	Mtb Genomic Template	Assisting Constant Force	14	1mM	No	1d-e, 2a	3	'AFs MtbRNAP'\'~13.7pN'
Mtb	Mtb Genomic Template	Assisting Constant Force	16	1mM	No	1d-e, 2a	4	'AFs MtbRNAP'\'~16pN'
Mtb	Mtb Genomic Template	Assisting Constant Force	9	1mM	No	1d-e, 2a	2	'AFs MtbRNAP'\'~9pN'
Mtb	Mtb Genomic Template	Opposing Constant Force	-4.5	1mM	No	2a	14	'OF MtbRNAP 4.5 pN'
Mtb	Mtb Genomic Template	Opposing Constant Force	-4.5	1mM	0.5uM MtbGreA	5g	15	'OF MtbRNAP MtbGreA'
Mtb	Mtb Genomic Template	Opposing Constant Force	-4.5	1mM	15uM Stl	5e	17	'OF MtbRNAP Stl 4.5pN'
Mtb	Mtb Genomic Template	Opposing Constant Force	-4.5	1mM	15uM Stl, 0.5uM MtbGreA	5g	9	'OF MtbRNAP Stl MtbGreA'
Mtb	Mtb Genomic Template	Opposing Constant Force	-12	1mM	No	2a	1	'OFs MtbRNAP'\'12 pN'
Mtb	Mtb Genomic Template	Opposing Constant Force	-17	1mM	No	2a	4	'OFs MtbRNAP'\'17.7pN'
Mtb	Mtb Genomic Template	Opposing Constant Force	-4.5	1mM	No	2a	14	'OFs MtbRNAP'\'4.5 pN'
Mtb	Mtb Genomic Template	Opposing Constant Force	-6	1mM	No	2a	4	'OFs MtbRNAP'\'5.7 pN'
Mtb	Mtb Genomic Template	Opposing Constant Force	-7	1mM	No	2a	3	'OFs MtbRNAP'\'6.7 pN'
Mtb	Mtb Genomic Template	Opposing Constant Force	-9	1mM	No	2a	10	'OFs MtbRNAP'\'7.8-9.1 pN'
Mtb	Mtb Genomic Template	Opposing Constant Force	-10	1mM	No	2a	5	'OFs MtbRNAP'\'9.6-11.3 pN'
Mtb	Mtb Ruler	Assisting Constant Force	18	1mM	No	4e, S1c	19	'a AF MM'
Mtb	Mtb Ruler	Opposing Constant Force	-4.5	1mM	No	2a, S1c	7	'ab OF MM NEGATED 4.5pN'
Mtb	Mtb Ruler	Opposing Constant Force	-9	1mM	No	2a, S1c	10	'abb OF MM NEGATED 9pN'
Mtb	Mtb Ruler	Opposing Constant Force	-13.5	1mM	No	2a, S1c	2	'abc OF MM NEGATED 13.4pN'
Mtb	Mtb Ruler	Assisting Constant Force	18	1mM	140nM D-IX216	4, S7	60	'b AF MM AAP'
Mtb	Mtb Ruler	Assisting Constant Force	18	1mM	560nM D-IX216	8, S5a	12	ba AF MM 560nM AAP'
Mtb	Mtb Ruler	Assisting Constant Force	18	1mM	4.5uM Stl	5, S7	9	'c AF MM Stl 4.5u'
Mtb	Mtb Ruler	Assisting Constant Force	18	1mM	15uM Stl	5, S8	22	'cb AF MM Stl 15u'
Mtb	Mtb Ruler	Assisting Constant Force	18	1mM	45uM Stl	5, S9	16	'cc AF MM Stl 45u'
Mtb	Mtb Ruler	Assisting Constant Force	18	1mM	1uM PUM	7, S7	27	'da AF MM PUM'
Mtb	Mtb Ruler	Assisting Constant Force	18	1mM	560nM D-IX216, 15uM Stl	8	11	'e AF MM Stl+AAP'
Mtb	Mtb Ruler	Assisting Constant Force	18	1mM	No	S2	19	'y AF EM'
Mtb	Mtb Ruler	Assisting Constant Force	18	1mM	140nM D-IX216	S2	6	'yb AF EM AAP'
Mtb	Mtb Ruler	Assisting Constant Force	18	1mM	No	None	26	'z AF MM'
Eco	Eco Ruler	Opposing Passive	0 to -20	1mM	No	2c-d	14	'a PM EcoRNAP'
Mtb	Mtb Genomic Template	Opposing Passive	0 to -20	1mM	No	2c-d	22	'b PM MtbRNAP'
Mtb	Mtb Genomic Template	Semipassive Assisting	10 to 18	100uM	No	S5b-c	8	'Semipassive 100uM rNTPs'
Mtb	Mtb Genomic Template	Semipassive Assisting	10 to 18	100uM	140nM D-IX216	S5b-c	3	'Semipassive 100uM rNTPs 140nM AAP'
Mtb	Mtb Genomic Template	Semipassive Assisting	10 to 18	250uM	No	S5b-c	6	'Semipassive 250uM rNTPs'
Mtb	Mtb Genomic Template	Semipassive Assisting	10 to 18	250uM	140nM D-IX216	S5b-c	2	'Semipassive 250uM rNTPs 140nM AAP'
Mtb	Mtb Genomic Template	Semipassive Assisting	10 to 18	25uM	No	S5b-c	11	'Semipassive 25uM rNTPs'
Mtb	Mtb Genomic Template	Semipassive Assisting	10 to 18	25uM	140nM D-IX216	S5b-c	17	'Semipassive 25uM rNTPs 140nM AAP'
Mtb	Mtb Genomic Template	Semipassive Assisting	10 to 18	50uM	No	S5b-c	8	'Semipassive 50uM rNTPs'
Mtb	Mtb Genomic Template	Semipassive Assisting	10 to 18	50uM	140nM D-IX216	S5b-c	21	'Semipassive 50uM rNTPs 140nM AAP'
