# Supplementary material for: Pleomorphic effects of three small-molecule inhibitors on transcription elongation by Mycobacterium tuberculosis RNA polymerase
Source: eLife journal article supplement (doi:10.7554/elife.105545), 2025-10-03
Supplement: supp [file Figure 3-figure supplement 1-source data 2.pdf › Figure 3-figure supplement 1-source data 2/Figure 3-figure supplement 1-source data 2.pdf]

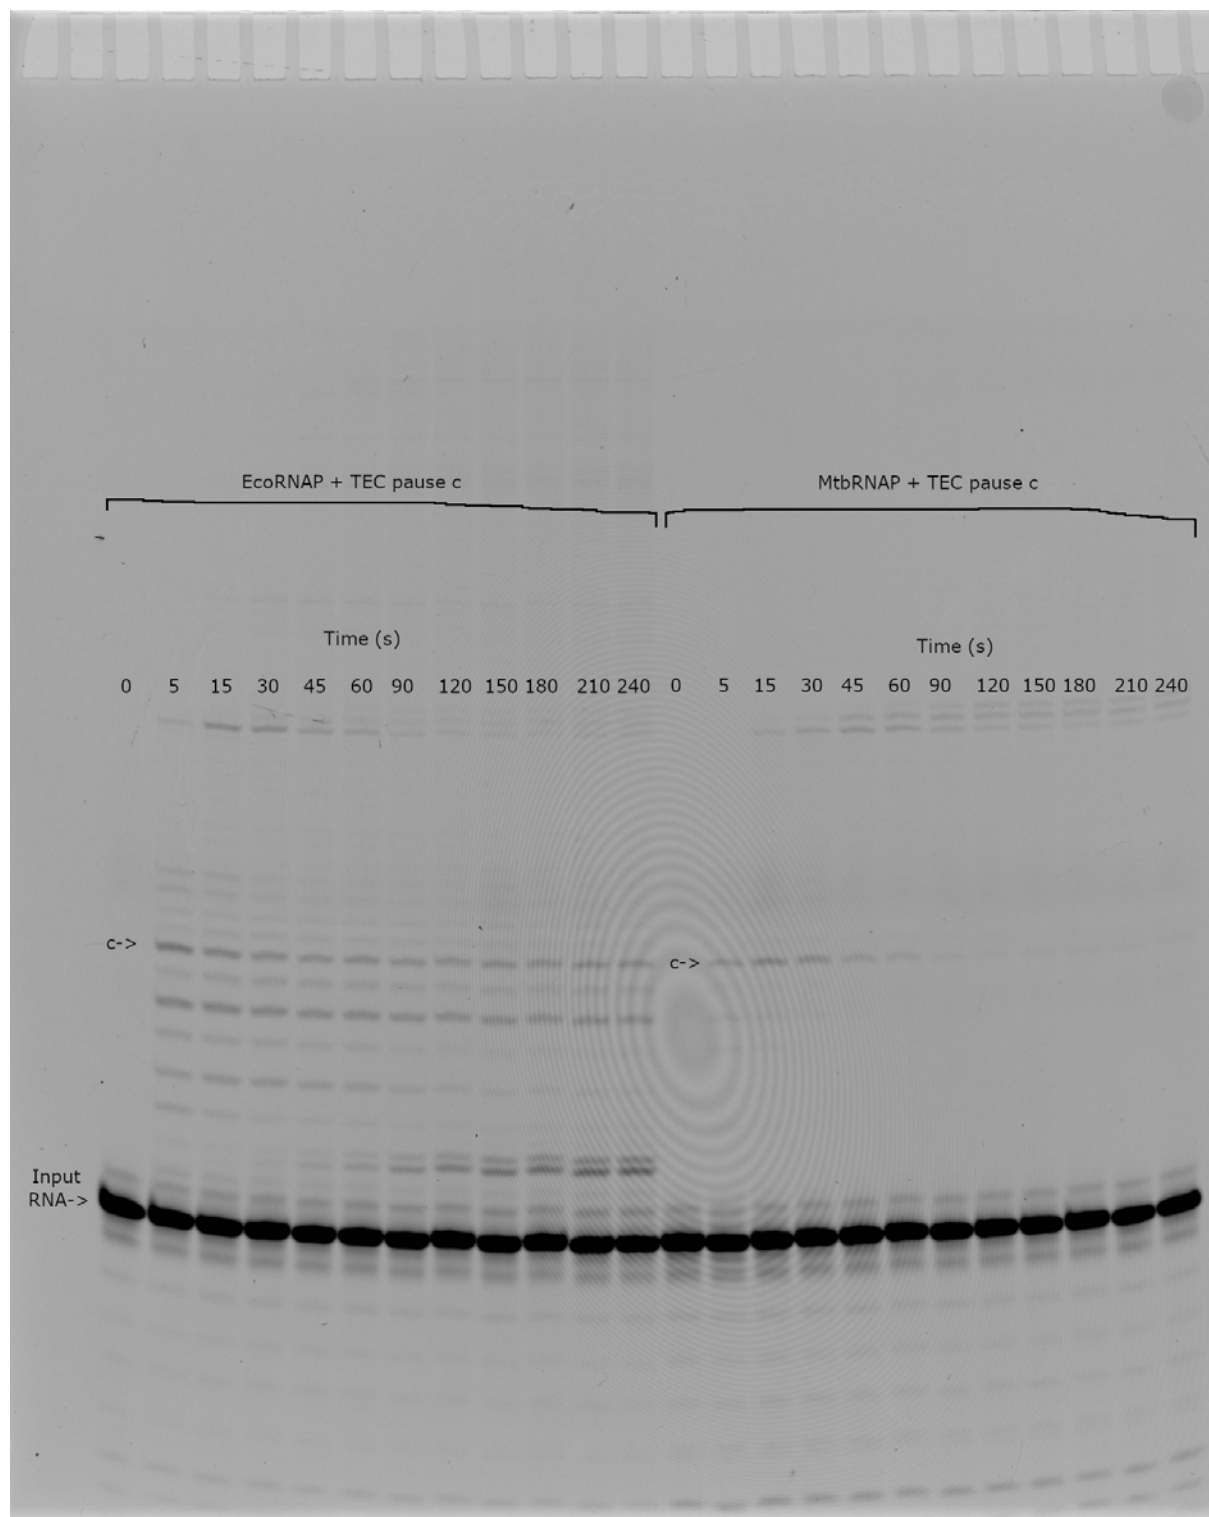

**Figure 3-figure supplement 1-source data 2.** Original RNA gel image for the time-course transcription experiments found in Figure 3-figure supplement 1, with labels. This is a RNA elongation assay, where the FAM-labeled input RNA is extended by the polymerase over time. Timepoints refer to time after adding rNTPs.
