# Supplementary figures and images for: Pleomorphic effects of three small-molecule inhibitors on transcription elongation by Mycobacterium tuberculosis RNA polymerase
Source: eLife journal article supplement (doi:10.7554/elife.105545), 2025-10-03

a

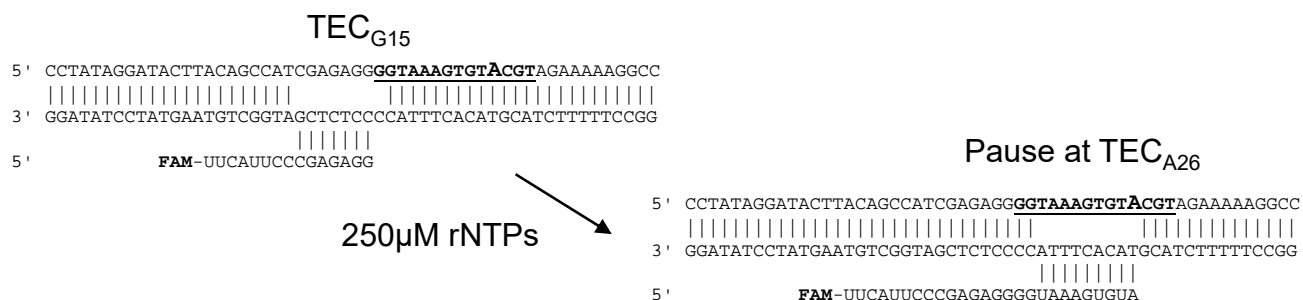

b

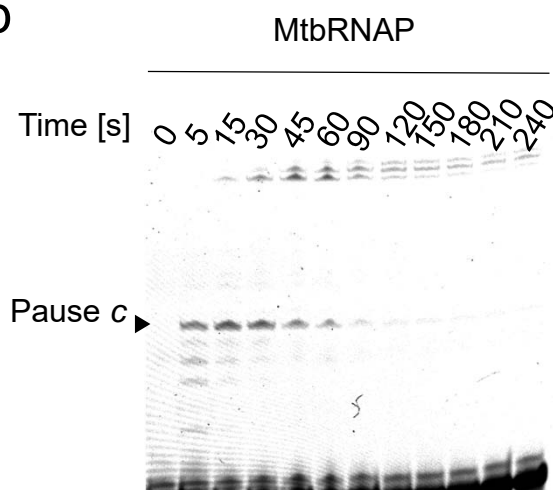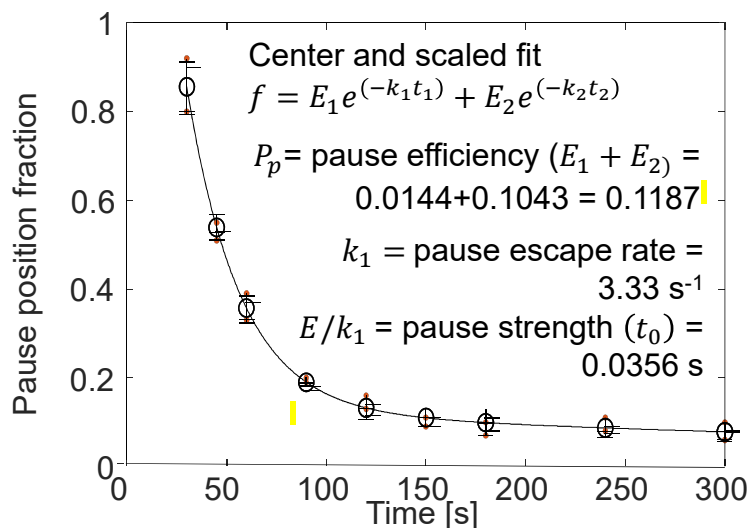

c

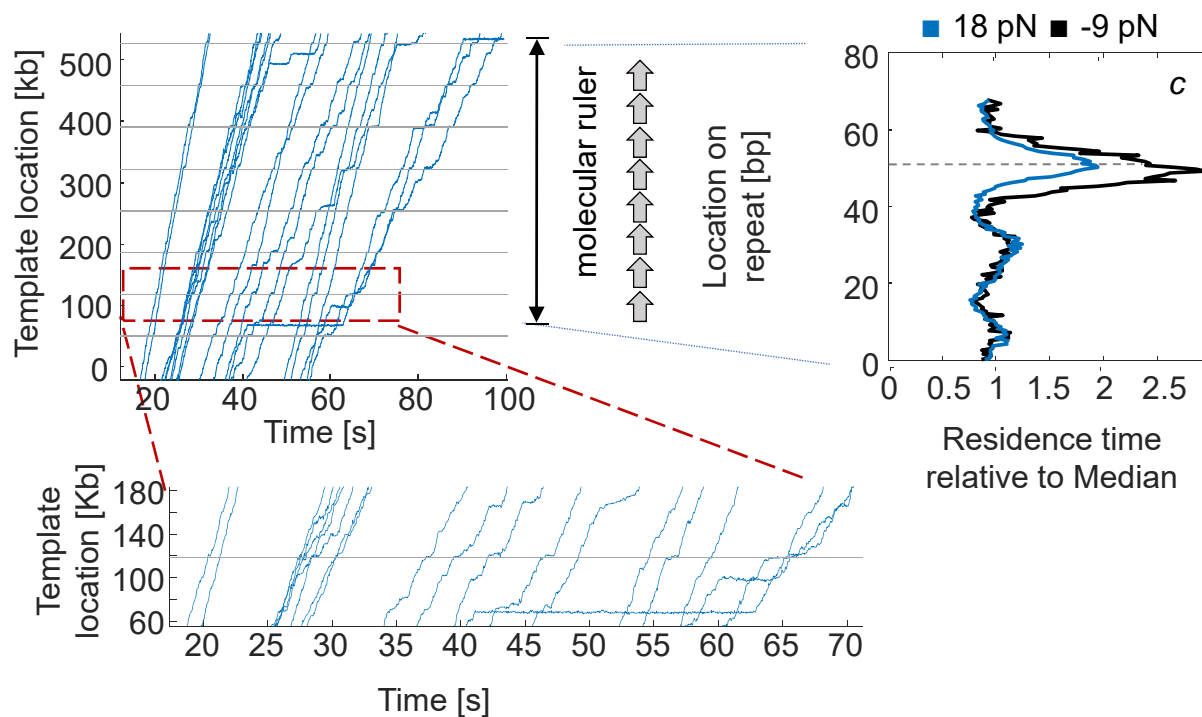

Supplement: supp [file elife_poa_e105545_Figure_3_Figure_supplement_1.pdf › elife_poa_e105545_Figure_3_Figure_supplement_1.pdf]

**a**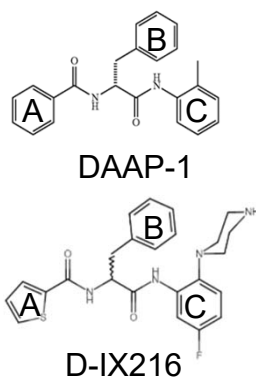**b**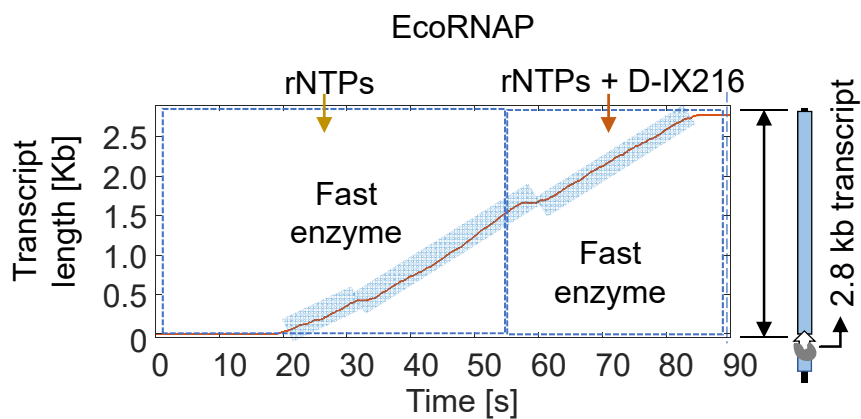**c**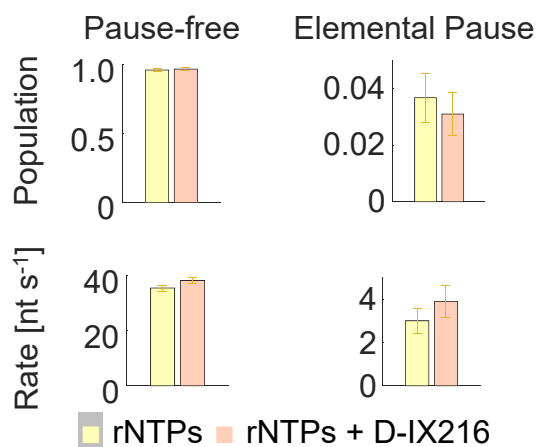**d**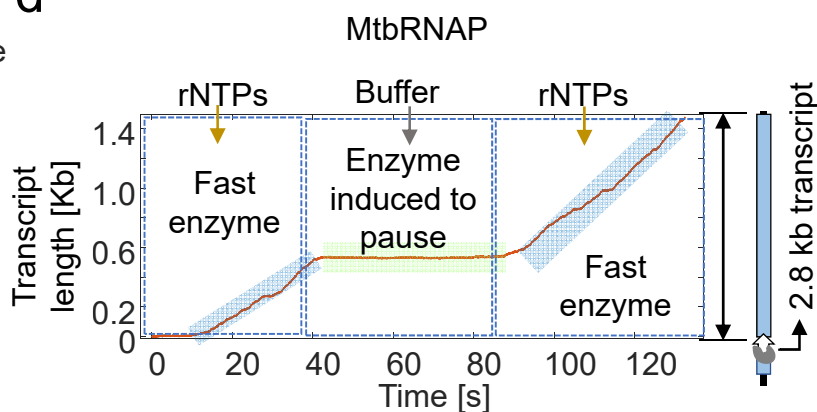**e**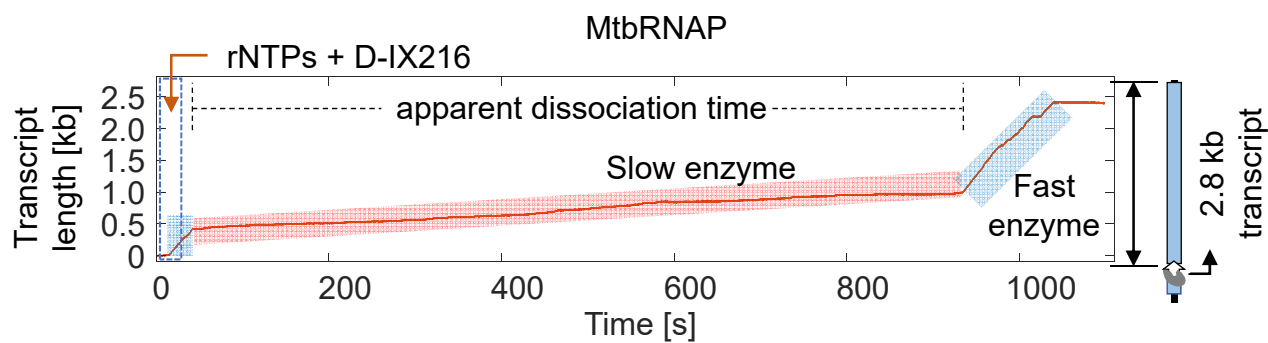**f**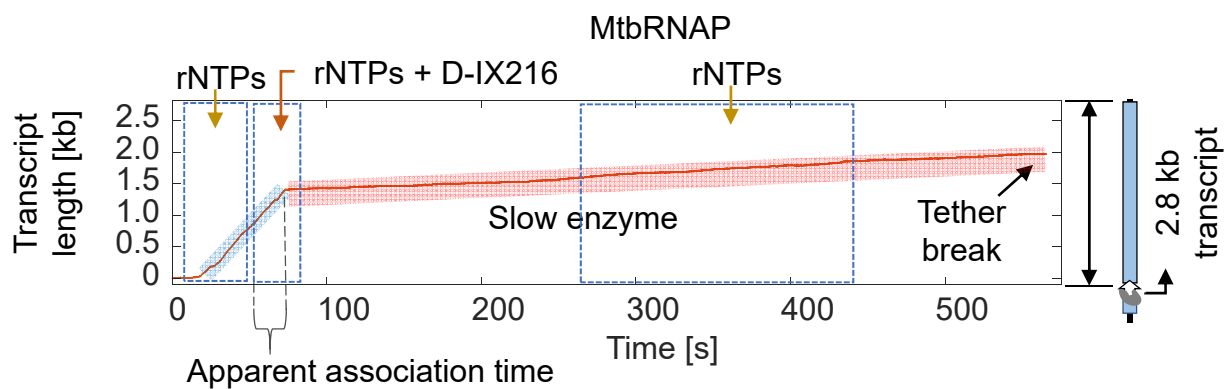

Supplement: supp [file elife_poa_e105545_Figure_4_Figure_supplement_1.pdf › elife_poa_e105545_Figure_4_Figure_supplement_1.pdf]

a

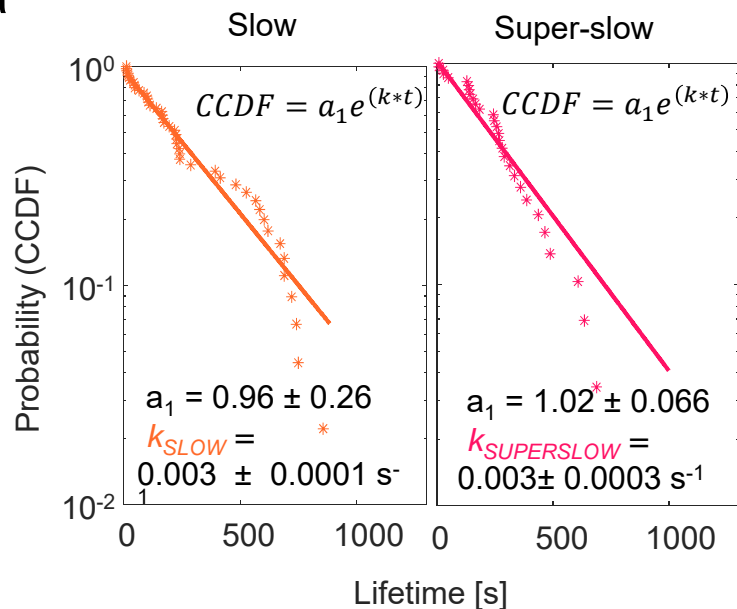

b

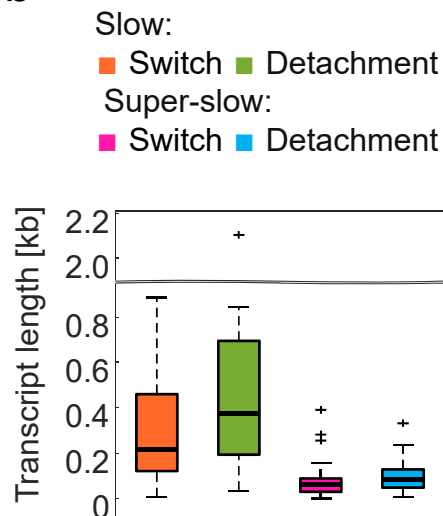

c

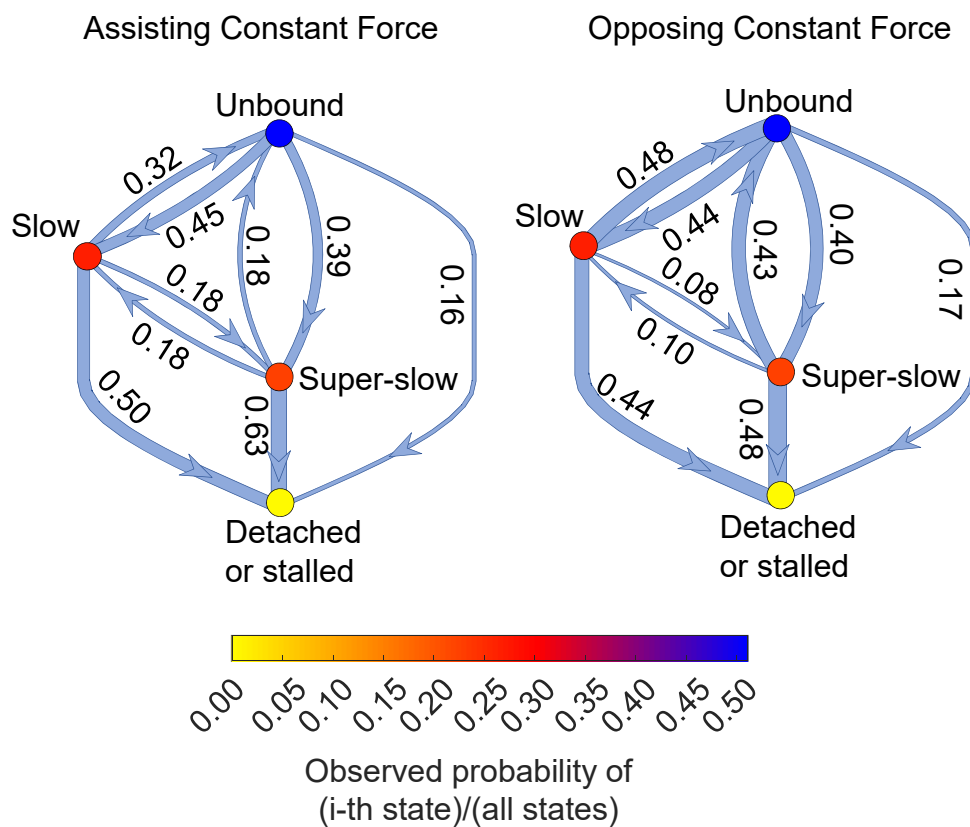

Supplement: supp [file elife_poa_e105545_Figure_4_Figure_supplement_2.pdf › elife_poa_e105545_Figure_4_Figure_supplement_2.pdf]

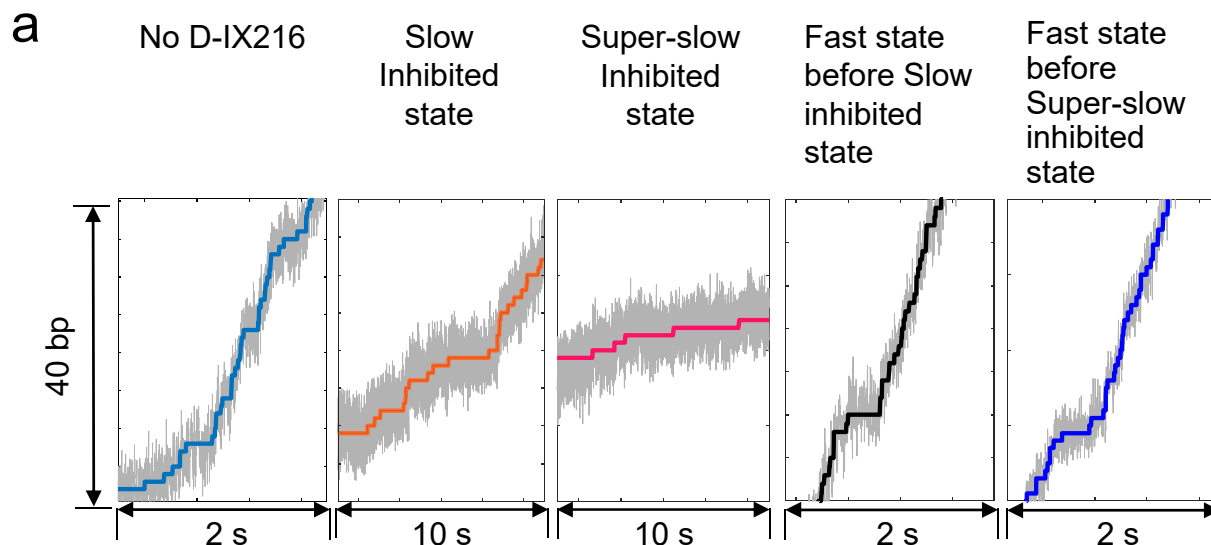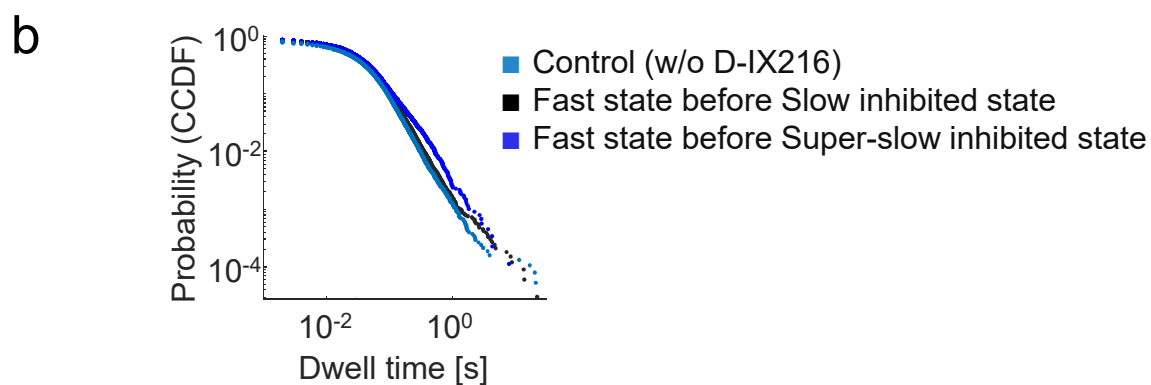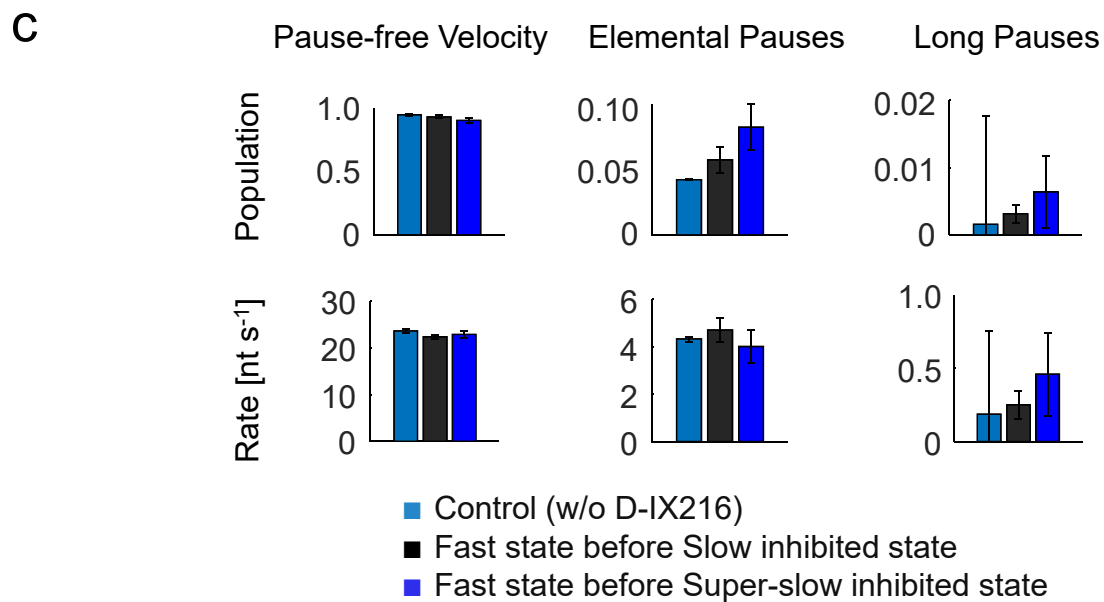

Supplement: supp [file elife_poa_e105545_Figure_4_Figure_supplement_3.pdf › elife_poa_e105545_Figure_4_Figure_supplement_3.pdf]

a

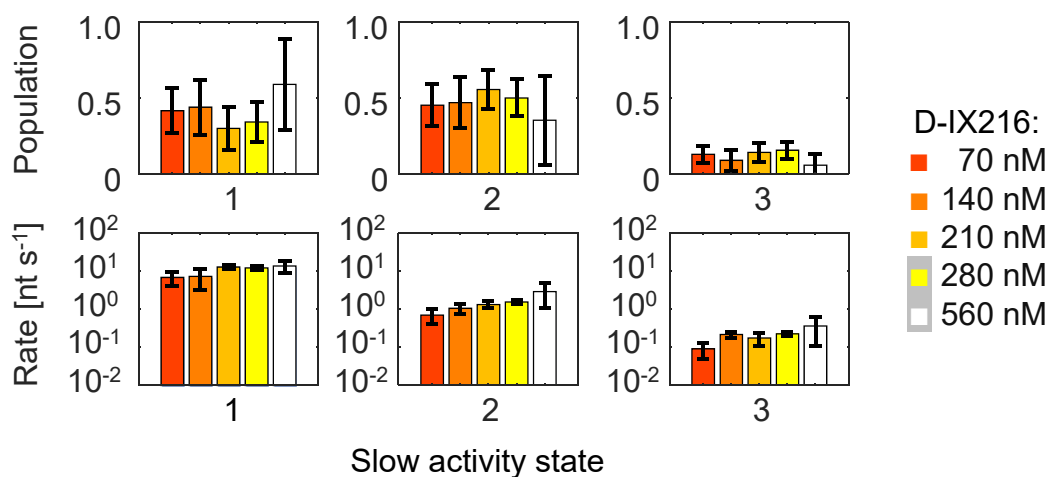

b

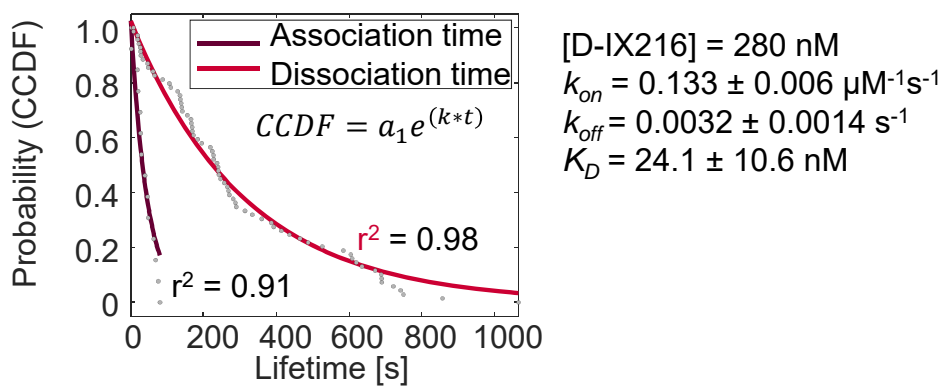

c

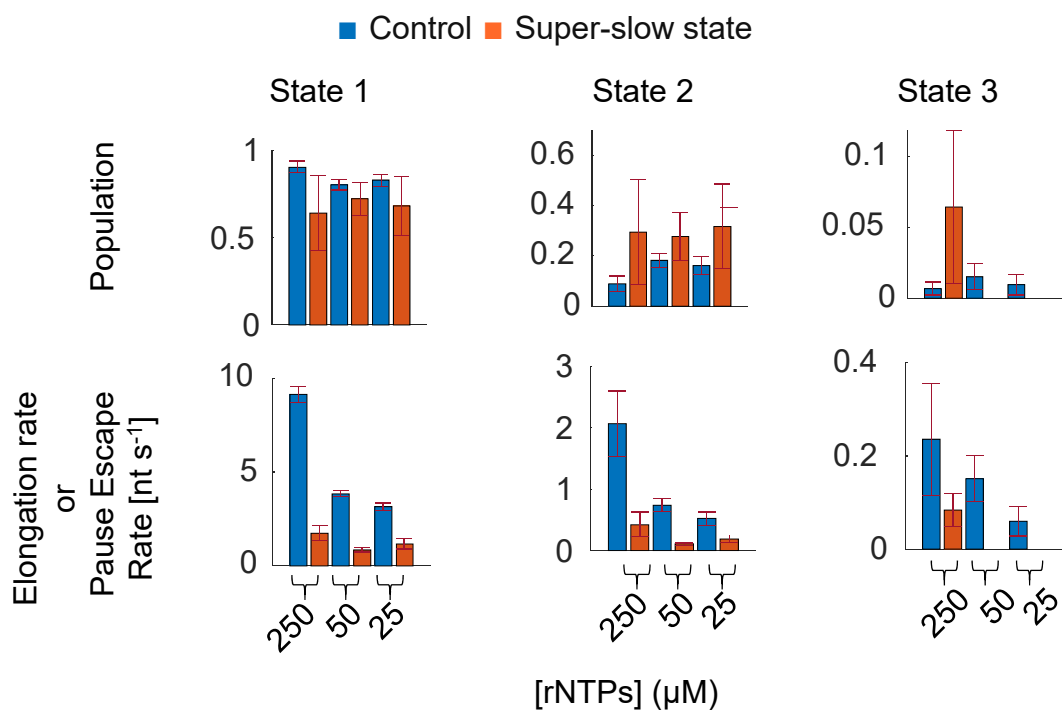

Supplement: supp [file elife_poa_e105545_Figure_4_Figure_supplement_4.pdf › elife_poa_e105545_Figure_4_Figure_supplement_4.pdf]

a

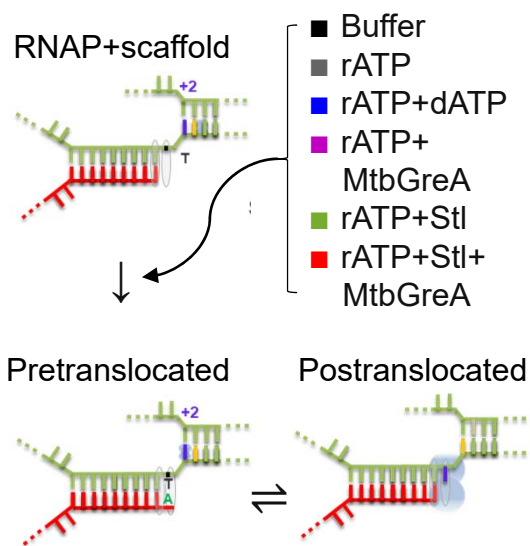

b

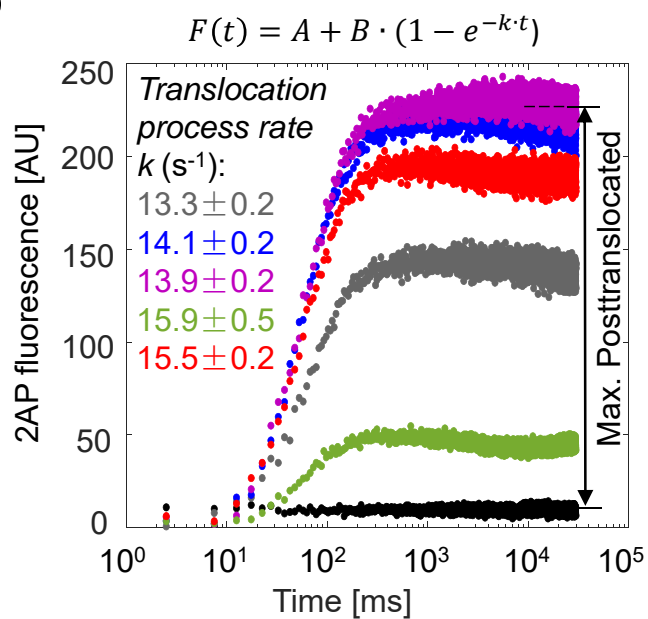

Supplement: supp [file elife_poa_e105545_Figure_5_Figure_supplement_1.pdf › elife_poa_e105545_Figure_5_Figure_supplement_1.pdf]

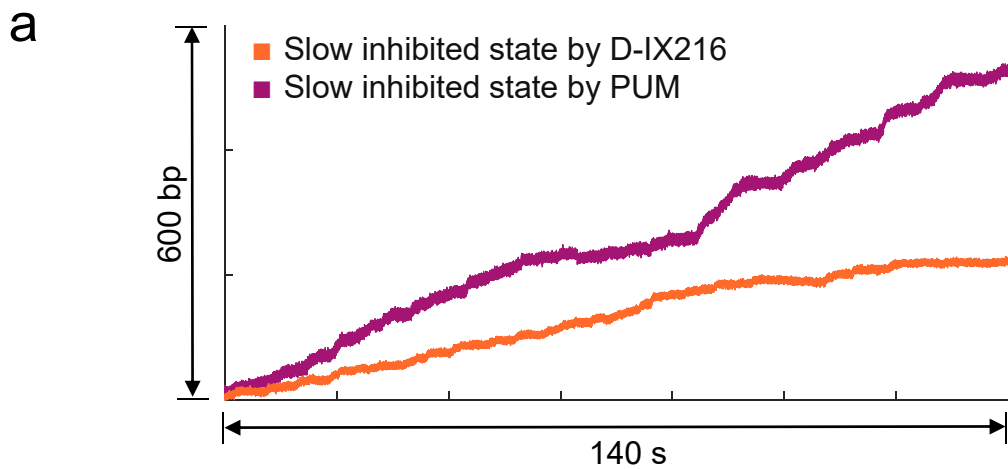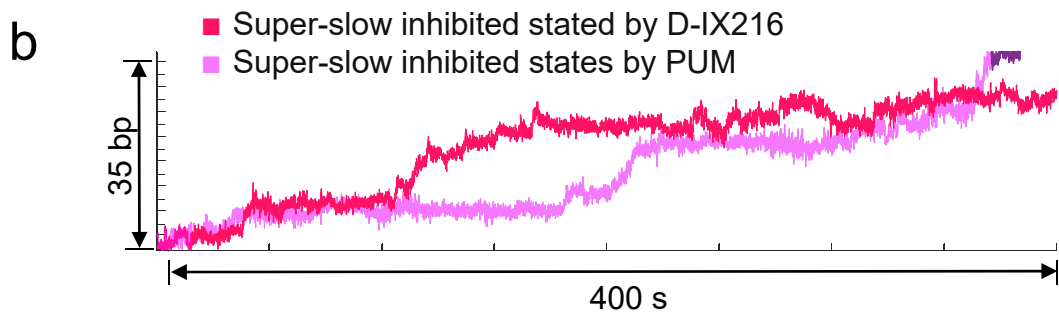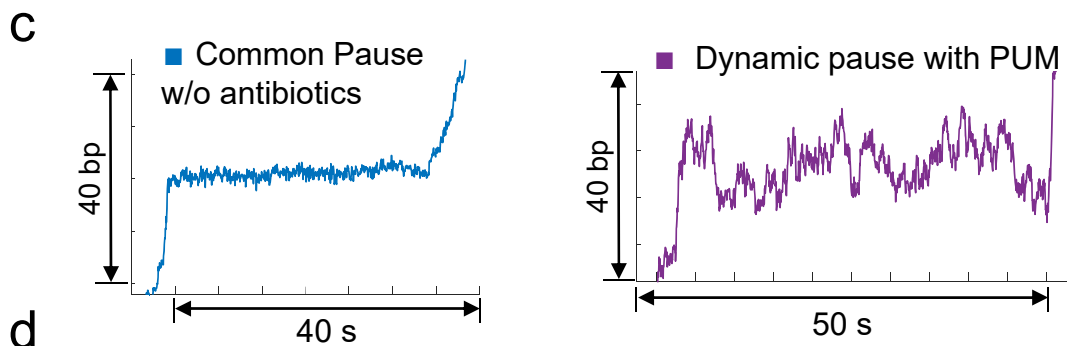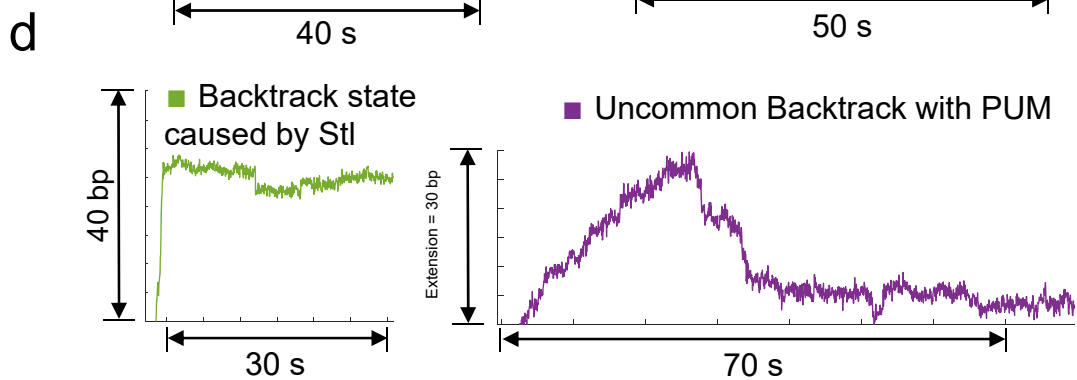

Supplement: supp [file elife_poa_e105545_Figure_7_Figure_supplement_1.pdf › elife_poa_e105545_Figure_7_Figure_supplement_1.pdf]
